# Supplementary material for: Effects of an Exercise Program on Brain Health Outcomes for Children With Overweight or Obesity: The ActiveBrains Randomized Clinical Trial
Source: PubMed Central journal article supplement (PMC9428743; doi:10.1001/jamanetworkopen.2022.27893), 2022-08-30
Supplement: jamanetwopen-e2227893-s003.pdf [file jamanetwopen-e2227893-s003.pdf]

## Data Sharing Statement

Ortega. Effects of an Exercise Program on Brain Health Outcomes for Children With Overweight or Obesity. *JAMA Netw Open*. Published August 30, 2022.

doi:10.1001/jamanetworkopen.2022.27893

### Data

**Data available:** No

### Additional Information

**Explanation for why data not available:** We did not obtain children's parents consent to widely share the data nor was it included in the IRB protocol.
